# Supplementary material
Source: MDPI journal article supplement (https://www.mdpi.com/2073-4395/9/9/504)
Supplement: s1 [file s1]

**Annex 1.** *P*-values for each of the factors (terms) in the variables measured.

| <b>Variable</b>       | <b>Term</b>    | <b><i>p</i>-value</b> |
|-----------------------|----------------|-----------------------|
| Fruit DW              | Treatment      | <0.001                |
|                       | Year           | <0.001                |
|                       | Treatment:Year | <0.001                |
| Shoot DW              | Treatment      | <0.001                |
|                       | Year           | 0.005                 |
|                       | Treatment:Year | <0.001                |
| Root DW               | Treatment      | <0.001                |
|                       | Year           | 0.007                 |
|                       | Treatment:Year | <0.001                |
| Fruit N uptake        | Treatment      | <0.001                |
|                       | Year           | <0.001                |
|                       | Treatment:Year | 0.002                 |
| Shoot N uptake        | Treatment      | <0.001                |
|                       | Year           | 0.02                  |
|                       | Treatment:Year | <0.001                |
| Root N uptake         | Treatment      | <0.001                |
|                       | Year           | <0.001                |
|                       | Treatment:Year | 0.01                  |
| Total N uptake        | Treatment      | <0.001                |
|                       | Year           | 0.01                  |
|                       | Treatment:Year | <0.001                |
| Mark. fruits number   | Treatment      | <0.0001               |
|                       | Year           | 0.0003                |
|                       | Treatment:Year | <0.0001               |
| Unmark. fruits number | Treatment      | <0.001                |
|                       | Year           | 0.04                  |
|                       | Treatment:Year | <0.0001               |
| Green fruits number   | Treatment      | 0.62                  |
|                       | Year           | 0.31                  |
|                       | Treatment:Year | 0.01                  |
| Total fruits number   | Treatment      | <0.0001               |
|                       | Year           | 0.0008                |
|                       | Treatment:Year | <0.0001               |
| Mark. fruits yield    | Treatment      | <0.001                |
|                       | Year           | 0.01                  |
|                       | Treatment:Year | <0.001                |
| Unmark. fruits yield  | Treatment      | <0.001                |
|                       | Year           | 0.01                  |
|                       | Treatment:Year | <0.001                |
| Green fruits yield    | Treatment      | <0.001                |
|                       | Year           | 0.14                  |
|                       | Treatment:Year | <0.001                |

| Variable             | Term           | <i>p</i> -value |
|----------------------|----------------|-----------------|
| Total yield          | Treatment      | <0.001          |
|                      | Year           | 0.03            |
|                      | Treatment:Year | <0.001          |
| Weed biomass         | Treatment      | <0.001          |
|                      | Year           | 0.08            |
|                      | Treatment:Year | <0.001          |
| Soil nitrates        | Treatment      | <0.001          |
|                      | Year           | <0.001          |
|                      | Treatment:Year | <0.001          |
| Soil compaction      | Treatment      | <0.001          |
|                      | Year           | 0.26            |
|                      | Treatment:Year | <0.001          |
| pH                   | Treatment      | 0.36            |
|                      | Year           | 0.03            |
|                      | Treatment:Year | 0.43            |
| TSS                  | Treatment      | 0.1             |
|                      | Year           | 0.88            |
|                      | Treatment:Year | 0.38            |
| Firmness 2016        | Treatment      | 0.75            |
| Firmness 2017        | Treatment      | <0.001          |
| Vitamin C            | Treatment      | 0.02            |
| Total phenols        | Treatment      | 0.80            |
| Antioxidant activity | Treatment      | 0.85            |
